# Supplementary material for: Glucose-assisted synthesis of a SnSx coated lithium titanate anode material for lithium-ion batteries
Source: Royal Society of Chemistry journal article supplement (doi:10.1039/d1tc04608j), 2021-01-01
Supplement: d1tc04608j1.pdf [file d1tc04608j1.pdf]

# Supporting Information

Glucose-assisted synthesis of SnS<sub>x</sub> coated lithium titanate anode material  
for lithium ion battery

Ting Xu<sup>a</sup>, Fang Xiang Song<sup>a</sup>, Xiang Feng Zhao<sup>a</sup>, Li Ju Zhou<sup>a</sup>, Qian lin Chen<sup>a,b,\*</sup>

\*Corresponding authors at: School of Chemistry and Chemical Engineering, Guizhou

University, Guiyang, 550025, China.

\* Corresponding authors.

E-mail: [cq11018@163.com](mailto:cq11018@163.com) (Q. Chen).

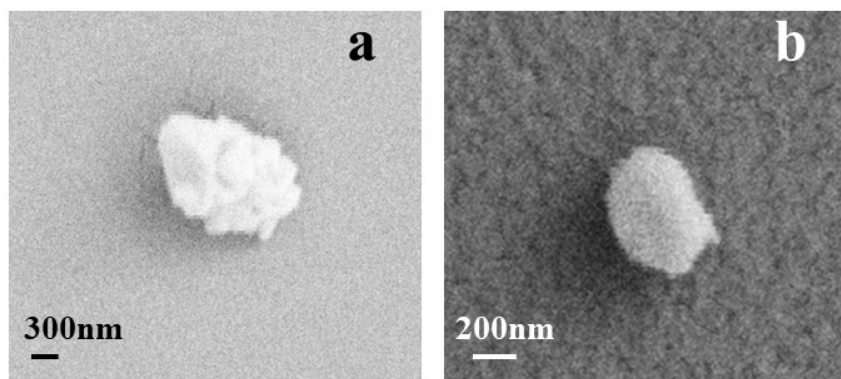

Fig.S1.(a).TEM image of SnS<sub>x</sub>@C/LTO, (b) TEM image of LTO

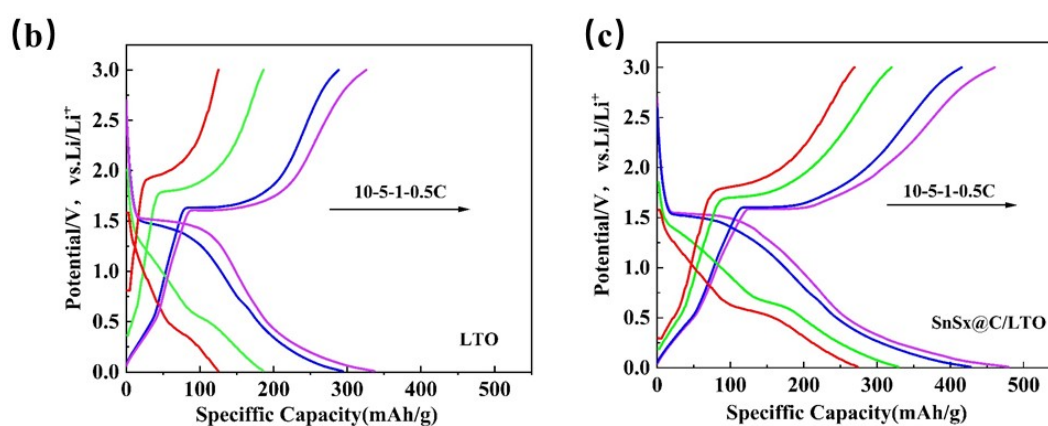

Fig.S2.Charge and discharge curves at different rates, (a) LTO, (b)SnS<sub>x</sub>@C/LTO

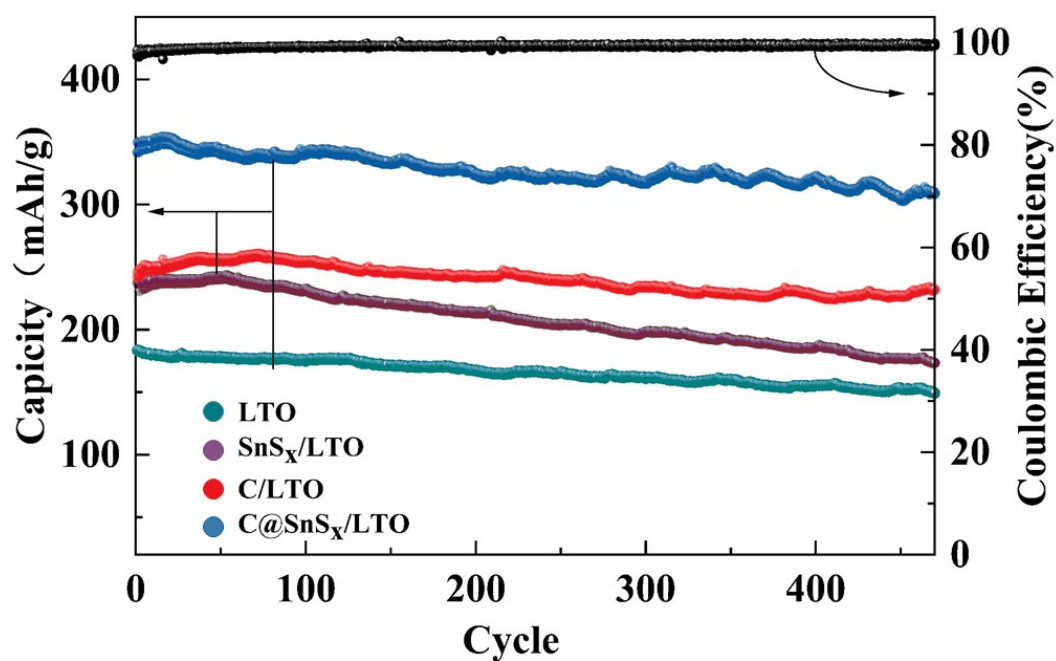

Fig.S3.The long-term cycle performance of LTO and SnS<sub>x</sub>@C/LTO cycled 500 times at 5C.

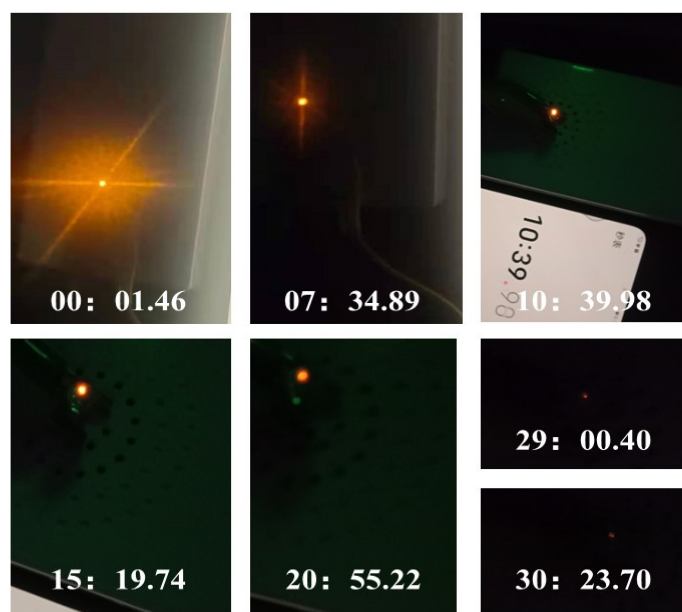

Fig.S4.The experimental phenomenon of lighting a small bulb

| Anode                        | Cycle stability        |                 |                         | Ref.                                                                                                                                                                                 |
|------------------------------|------------------------|-----------------|-------------------------|--------------------------------------------------------------------------------------------------------------------------------------------------------------------------------------|
|                              | Current density (mA/g) | After nth cycle | Charge capacity (mAh/g) |                                                                                                                                                                                      |
| <b>This work</b>             | 10C<br>1C (175)        | 500             | 227.53<br>425.8         | the work                                                                                                                                                                             |
| <b>LT-ZnO</b>                | 1C (175)               | 250             | 190                     | $\text{Li}_4\text{Ti}_5\text{O}_{12}$ coated with ultrathin aluminum-doped zinc oxide films as an anode material for lithium-ion batteries <sup>1</sup>                              |
| <b>LTO-LiCoO<sub>2</sub></b> | 1A/g<br>2A/g<br>3A/g   | 100             | 192.1<br>163.7<br>108.2 | Lithium cobalt oxide coated lithium zinc titanate anode material with an enhanced high rate capability and long lifespan for lithium-ion batteries <sup>2</sup>                      |
| <b>LTO-h-BN</b>              | 10C (175)<br>20C       |                 | 179.5<br>174.1          | Hexagonal boron nitride incorporation to achieve high performance $\text{Li}_4\text{Ti}_5\text{O}_{12}$ electrodes <sup>3</sup>                                                      |
| <b>SrF<sub>2</sub>-LTO</b>   | 5C (875)<br>10C<br>20C |                 | 149<br>136<br>107       | Enhanced electrochemical performance of SrF <sub>2</sub> -modified $\text{Li}_4\text{Ti}_5\text{O}_{12}$ composite anode materials for lithium-ion batteries <sup>4</sup>            |
| <b>AlF<sub>3</sub>-LTO</b>   | 5C (175)               | 50              | 140                     | Synergetic effect of carbon and AlF <sub>3</sub> coatings on the lithium titanium oxide anode material for high power lithium-ion batteries <sup>5</sup>                             |
| <b>SmF<sub>3</sub>-LTO</b>   | 10C (170)              |                 | 143.8                   | A porous mooncake-shaped $\text{Li}_4\text{Ti}_5\text{O}_{12}$ anode material modified by SmF <sub>3</sub> and its electrochemical performance in lithium-ion batteries <sup>6</sup> |

|                                                                                    |               |      |            |                                                                                                                                                                                                                                                |
|------------------------------------------------------------------------------------|---------------|------|------------|------------------------------------------------------------------------------------------------------------------------------------------------------------------------------------------------------------------------------------------------|
| <b>MgCo<sub>2</sub>O<sub>4</sub>-LTO</b>                                           | 1C<br>(175)   |      | 300        | Synthesis of MgCo <sub>2</sub> O <sub>4</sub> -coated Li <sub>4</sub> Ti <sub>5</sub> O <sub>12</sub> composite anodes using co-precipitation method for lithium-ion batteries <sup>7</sup>                                                    |
| <b>LTO-Li<sub>2</sub>ZrO<sub>3</sub></b>                                           | 500mA<br>/g   | 2000 | 102        | Li <sub>4</sub> Ti <sub>5</sub> O <sub>12</sub> composited with Li <sub>2</sub> ZrO <sub>3</sub> revealing simultaneously meliorated ionic and electronic conductivities as high performance anode materials for Li-ion batteries <sup>8</sup> |
| <b>LTO/Cu<sub>x</sub>O</b>                                                         | 10C<br>(175)  | 100  | 137.6      | Research on Li <sub>4</sub> Ti <sub>5</sub> O <sub>12</sub> /Cu <sub>x</sub> O Composite Anode Materials for Lithium-Ion Batteries <sup>9</sup>                                                                                                |
| <b>Fe<sub>2</sub>O<sub>3</sub>-LTO</b>                                             | 10C<br>(175)  |      | 109.4      | Improved capacity and rate capability of Fe <sub>2</sub> O <sub>3</sub> modified Li <sub>4</sub> Ti <sub>5</sub> O <sub>12</sub> anode material <sup>10</sup>                                                                                  |
| <b>Fe<sub>2</sub>O<sub>3</sub>/Li<sub>4</sub>Ti<sub>5</sub>O<sub>12</sub></b><br>2 | 176mA<br>/g   | 100  | 238.9      | Graphitized carbon and graphene modified Fe <sub>2</sub> O <sub>3</sub> /Li <sub>4</sub> Ti <sub>5</sub> O <sub>12</sub> as anode material for lithium ion batteries <sup>11</sup>                                                             |
| <b>LTO-Fe<sub>2</sub>O<sub>3</sub> nd</b><br><b>LTO-CuO</b>                        | 1C<br>(175)   |      | 216<br>200 | High rate Li <sub>4</sub> Ti <sub>5</sub> O <sub>12</sub> -Fe <sub>2</sub> O <sub>3</sub> and Li <sub>4</sub> Ti <sub>5</sub> O <sub>12</sub> -CuO composite anodes for advanced lithium ion batteries <sup>12</sup>                           |
| <b>V<sub>2</sub>O<sub>3</sub>-LTO</b>                                              | 0.1A/g        |      | 300        | Interconnected Ultrasmall V <sub>2</sub> O <sub>3</sub> and Li <sub>4</sub> Ti <sub>5</sub> O <sub>12</sub> Particles Construct Robust Interfaces for Long-Cycling Anodes of Lithium-Ion Batteries <sup>13</sup>                               |
| <b>Carbon-coated LTO</b>                                                           | 1000m<br>A/g  |      | 181        | Carbon-coated Li <sub>4</sub> Ti <sub>5</sub> O <sub>12</sub> tablets derived from metal-organic frameworks as anode material for lithium-ion batteries <sup>14</sup>                                                                          |
| <b>N-doped carbon-coated LTO</b>                                                   | 10C<br>(175)  | 200  | 136.8      | Facile synthesis of N-doped carbon-coated Li <sub>4</sub> Ti <sub>5</sub> O <sub>12</sub> microspheres using polydopamine as a carbon source for high rate lithium ion batteries <sup>15</sup>                                                 |
| <b>Ti and C coated LTO</b>                                                         | 0.1A/g        |      | 160        | Synthesis and electrochemical performance of nano-sized Li <sub>4</sub> Ti <sub>5</sub> O <sub>12</sub> with double surface modification of Ti(III) and carbon <sup>16</sup>                                                                   |
| <b>boron-doped carbon-coated LTO</b>                                               | 10C<br>(175)  | 300  | 98.4       | Improved electrochemical performance of boron-doped carbon-coated lithium titanate as an anode <sup>17</sup>                                                                                                                                   |
| <b>Nitrogen, sulfur Co-doped porous graphene boosting LTO</b>                      | 10C<br>(175)  |      | 160        | Nitrogen, sulfur Co-doped porous graphene boosting Li <sub>4</sub> Ti <sub>5</sub> O <sub>12</sub> anode Performance for High-Rate and Long-Life Lithium Ion Batteries <sup>18</sup>                                                           |
| <b>LTO/SiO<sub>2</sub></b>                                                         | 10C<br>(1600) | 100  | 140        | Structural and electrochemical characteristics of SiO <sub>2</sub> modified Li <sub>4</sub> Ti <sub>5</sub> O <sub>12</sub> as anode for lithium-ion batteries <sup>19</sup>                                                                   |

**Table.S1. Comparison of different modification methods**

### References:

- <sup>1</sup> Y. Jin, H. Yu, Y. Gao, X. He, T.A. White, X. Liang, Li<sub>4</sub>Ti<sub>5</sub>O<sub>12</sub> coated with ultrathin aluminum-doped zinc oxide films as an anode material for lithium-ion batteries, J. POWER SOURCES, 436(2019) 226859.
- <sup>2</sup> H. Tang, J. Zhu, C. Ma, Z. Tang, Lithium cobalt oxide coated lithium zinc titanate anode material with an enhanced high rate capability and long lifespan for lithium-ion batteries, ELECTROCHIM. ACTA, 144(2014) 76-84.
- <sup>3</sup> O. Ergen, Hexagonal boron nitride incorporation to achieve high performance

- 
- Li<sub>4</sub>Ti<sub>5</sub>O<sub>12</sub> electrodes, *AIP ADV*, 10(2020) 45040.
- <sup>4</sup> X. Li, X. Zhao, P. Huang, M. Wang, Y. Huang, Y. Zhou, Y. Lin, M. Qu, Z. Yu, Enhanced electrochemical performance of SrF<sub>2</sub>-modified Li<sub>4</sub>Ti<sub>5</sub>O<sub>12</sub> composite anode materials for lithium-ion batteries, *J. ALLOY. COMPD*, 693(2017) 61-69.
- <sup>5</sup> Y. Chung, Y. Shin, Y. Liu, J.S. Park, C.L. Margez, T.A. Greszler, Synergetic effect of carbon and AlF<sub>3</sub> coatings on the lithium titanium oxide anode material for high power lithium-ion batteries, *J. ELECTROANAL. CHEM.*, 837(2019) 240-245
- <sup>6</sup> Wang B, Hu S, Gu L, et al. A Porous Mooncake-Shaped Li<sub>4</sub>Ti<sub>5</sub>O<sub>12</sub> Anode Material Modified by SmF<sub>3</sub> and Its Electrochemical Performance in Lithium Ion Batteries[J]. *Chemistry - A European Journal*, 2020.
- <sup>7</sup> S. Gu, C. Hsieh, M.M. Huq, J. Hsu, J. Li, Synthesis of MgCo<sub>2</sub>O<sub>4</sub>-coated Li<sub>4</sub>Ti<sub>5</sub>O<sub>12</sub> composite anodes using co-precipitation method for lithium-ion batteries, *J. SOLID STATE ELECTRO.*, 23(2019) 3197-3207
- <sup>8</sup> Han J P, Zhang B, Bai X, et al. Li<sub>4</sub>Ti<sub>5</sub>O<sub>12</sub> composited with Li<sub>2</sub>ZrO<sub>3</sub> revealing simultaneously meliorated ionic and electronic conductivities as high performance anode materials for Li-ion batteries[J]. *Journal of Power Sources*, 2017, 354(JUN.30):16-25.
- <sup>9</sup> Huang, S.; Wen, Z.; Zhu, X.; Yang, X. Research on Li<sub>4</sub>Ti<sub>5</sub>O<sub>12</sub>/Cu<sub>x</sub>O Composite Anode Materials for Lithium-Ion Batteries. *J. Electrochem. Soc.* **2005**, 152, A1301.
- <sup>10</sup> B. Wang, J. Cao, Y. Liu, T. Zeng, L. Li, Improved capacity and rate capability of Fe<sub>2</sub>O<sub>3</sub> modified Li<sub>4</sub>Ti<sub>5</sub>O<sub>12</sub> anode material, *J. ALLOY. COMPD*, 587(2014) 21-25.
- <sup>11</sup> Q. Wang, M. Lu, J. Miao, S. Yang, T. Wen, J. Sun, Graphitized carbon and graphene modified Fe<sub>2</sub>O<sub>3</sub>/Li<sub>4</sub>Ti<sub>5</sub>O<sub>12</sub> as anode material for lithium ion batteries, *SURF. INTERFACE ANAL.*, 49(2017) 63-70.
- <sup>12</sup> M. Hu, Y. Jiang, M. Yan, High rate Li<sub>4</sub>Ti<sub>5</sub>O<sub>12</sub>-Fe<sub>2</sub>O<sub>3</sub> and Li<sub>4</sub>Ti<sub>5</sub>O<sub>12</sub>-CuO composite anodes for advanced lithium ion batteries, *J. ALLOY. COMPD*, 603(2014) 202-206.
- <sup>13</sup> D. Lei, H. Ye, C. Liu, D. An, J. Ma, W. Lv, B. Li, F. Kang, Y. He, Interconnected Ultrasmall V<sub>2</sub>O<sub>3</sub> and Li<sub>4</sub>Ti<sub>5</sub>O<sub>12</sub> Particles Construct Robust Interfaces for Long-Cycling Anodes of Lithium-Ion Batteries, *ACS APPL MATER INTER*, 11(2019) 29993-30000.
- <sup>14</sup> Song, Huaihe, Chen, et al. Carbon-coated Li<sub>4</sub>Ti<sub>5</sub>O<sub>12</sub> tablets derived from metal-organic frameworks as anode material for lithium-ion batteries[J]. *Journal of Alloys and Compounds: An Interdisciplinary Journal of Materials Science and Solid-state Chemistry and Physics*, 2017, 708:6-13.
- <sup>15</sup> Li H, Shen L, Yin K, et al. Facile synthesis of N-doped carbon-coated Li<sub>4</sub>Ti<sub>5</sub>O<sub>12</sub> microspheres using polydopamine as a carbon source for high rate lithium ion batteries[J]. *Journal of Materials Chemistry A*, 2013, 1(24):7270-7276.
- <sup>16</sup> Wang, Y.; Liu, H.; Wang, K.; Eiji, H.; Wang, Y.; Zhou, H. Synthesis and electrochemical performance of nano-sized Li<sub>4</sub>Ti<sub>5</sub>O<sub>12</sub> with double surface modification of Ti(III) and carbon. *Journal of Materials Chemistry* **2009**, 19, 6789.
- <sup>17</sup> Hwang, Jang-Yeon, Yun, et al. Improved electrochemical performance of boron-doped carbon-coated lithium titanate as an anode material for sodium-ion batteries[J]. *Journal of Materials Chemistry A Materials for Energy & Sustainability*, 2017.
- <sup>18</sup> D Wang, Liu H, Shan Z, et al. Nitrogen, Sulfur Co-doped Porous Graphene Boosts

---

Li<sub>4</sub>Ti<sub>5</sub>O<sub>12</sub> Anode Performance for High-Rate and Long-Life Lithium Ion Batteries[J]. Energy Storage Materials, 2020, 27.

<sup>19</sup> Wu, Rui, Chen, et al. Structural and electrochemical characteristics of SiO<sub>2</sub> modified Li<sub>4</sub>Ti<sub>5</sub>O<sub>12</sub> as anode for lithium-ion batteries[J]. Journal of Alloys and Compounds: An Interdisciplinary Journal of Materials Science and Solid-state Chemistry and Physics, 2015.
